## SUPPLEMENTARY DATA

### Museomics resolve the systematics of an endangered grass lineage endemic to NW Madagascar

Silva C., Besnard G., Piot A., Razanatsoa J., Oliveira R.P. and Vorontsova M.S.

Supplementary data consist of the following:

**Table S1.** Voucher information and GenBank accession numbers for the sequences used in this study.

**Table S2.** Sequence characteristics of nuclear ribosomal DNA units and complete chloroplast genomes generated in the present study by NGS.

**Table S3.** Number of paired-end reads (Nr; excluding duplicates), size of the assembled fragments (%S; coverage in percent of the reference sequence) and mean sequencing depth (SD) for the three low-copy genes analyzed in this study.

**Figure S1.** Full maximum likelihood (ML) phylogram from the analysis of the plastid marker *ndhF* showing the phylogenetic placement of *Chasechloa*.

**Figure S2.** Maximum likelihood (ML) phylogram from the analysis of the nuclear marker ITS showing the phylogenetic placement of *Chasechloa*.

**Figure S3.** Maximum likelihood (ML) phylogram from the analysis of the nuclear marker *phyB* showing the phylogenetic placement of *Chasechloa*.

**Figure S4.** Maximum likelihood (ML) phylogram from the analysis of the nuclear marker *ppc-aL2* showing the phylogenetic placement of *Chasechloa*.

**Figure S5.** Maximum likelihood (ML) phylogram from the analysis of the nuclear marker *ppc-aR* showing the phylogenetic placement of *Chasechloa*.

**Figure S6.** Maximum clade credibility chronogram of the core Panicoideae resulting from the BEAST analysis based on the *ndhF* data set.

**Table S1.** Voucher information and GenBank accession numbers for the sequences used in this study. New sequences generated in this study are in boldface.

| Taxon                                                                  | Voucher                                            | GenBank accession numbers |     |                |               |                       |
|------------------------------------------------------------------------|----------------------------------------------------|---------------------------|-----|----------------|---------------|-----------------------|
|                                                                        |                                                    | <i>ndhF</i>               | ITS | <i>ppc-aL2</i> | <i>ppc-aR</i> | <i>phyB</i>           |
| <i>Acritochaete volkensis</i> Pilg.                                    | Carvalho 3691 (G)                                  | HE573491                  | –   | –              | –             | –                     |
| <b><i>Acroceras calcicola</i> A. Camus</b>                             | <b>M.S. Vorontsova et al. 1379 (K, MO, P, TAN)</b> | <b>LT593943</b>           | –   | –              | –             | –                     |
| <i>Acroceras excavatum</i> (Henrard) Zuloaga & Morrone                 | Morrone 5025 (SI)                                  | EF218707                  | –   | –              | –             | –                     |
| <i>Acroceras tonkinense</i> (Balansa) C.E. Hubb. ex Bor                | AT & SS 630 (TCD)                                  | AM849121                  | –   | –              | –             | –                     |
| <b><i>Acroceras zizanioides</i> (Kunth) Dandy</b>                      | <b>O. Tostain 2616 (CAY)</b>                       | <b>LT593936</b>           | –   | –              | –             | –                     |
| <i>Acroceras zizanioides</i> (Kunth) Dandy                             | –                                                  | AY029618                  | –   | –              | –             | –                     |
| <i>Alexfloydia repens</i> B.K. Simon                                   | S.J. & T.R. Hodkinson 9391 (TCD)                   | HE573538                  | –   | –              | –             | –                     |
| <i>Alloteropsis angusta</i> Stapf                                      | M. Namaganda & O. Wanyana Dec09 (MHU)              | –                         | –   | FR845879       | FR845890      | FR845915              |
| <i>Alloteropsis angusta</i> Stapf                                      | Namaganda 1474                                     | EU159715                  | –   | –              | –             | –                     |
| <i>Alloteropsis cimicina</i> (L.) Stapf                                | SHD Ibrahim 24                                     | EU159711                  | –   | FR845882       | FR845892      | FR845917,<br>FR845918 |
| <b><i>Alloteropsis paniculata</i> (Benth.) Stapf</b>                   | <b>M.S. Vorontsova et al. 627 (K, MO, P, TAN)</b>  | <b>LT593937</b>           | –   | –              | –             | –                     |
| <i>Alloteropsis paniculata</i> (Benth.) Stapf                          | Callens 2975                                       | EU159712                  | –   | –              | –             | –                     |
| <i>Alloteropsis papillosa</i> Clayton                                  | Milne-Redhead 7393                                 | EU159714                  | –   | –              | –             | –                     |
| <i>Alloteropsis semialata</i> (R. Br.) Hitchc.                         | AT & SS 837 (TCD)                                  | AM849123                  | –   | –              | –             | –                     |
| <i>Alloteropsis semialata</i> subsp. <i>semialata</i> (R. Br.) Hitchc. | A. Teerawatananon and S. Sungkaew 630 (TCD)        | –                         | –   | FR845876       | FR845889      | FR845910,<br>FR845911 |
| <i>Altoparadisium chapadense</i> Filg., Davidse, Zuloaga & Morrone     | –                                                  | –                         | –   | –              | –             | EU272414              |
| <i>Amphicarpum amphicarpon</i> (Pursh) Nash                            | –                                                  | JN604673                  | –   | –              | –             | –                     |
| <i>Amphicarpum muhlenbergianum</i> (Schult.) Hitchc.                   | R. Krul 90483 (GH)                                 | HE586631                  | –   | –              | –             | –                     |
| <i>Amphipogon caricinus</i> F. Muell.                                  | Hodkinson 9359                                     | HE573475                  | –   | –              | –             | –                     |
| <i>Ancistrachne uncinulata</i> (R. Br.) S.T. Blake                     | S.J. & T.R. Hodkinson 9287 (TCD)                   | HE573521                  | –   | –              | –             | –                     |
| <i>Andropogon gerardi</i> Vitman                                       | –                                                  | AF117391                  | –   | –              | –             | –                     |
| <i>Anomochloa marantoidea</i> Brongn.                                  | L.G. Clark 1299                                    | –                         | –   | –              | –             | AF137291              |
| <i>Anthraenantia lanata</i> (Kunth) Benth.                             | –                                                  | –                         | –   | –              | –             | EU272415              |

| Taxon                                                     | Voucher                                           | GenBank accession numbers |                 |                  |                  |                 |
|-----------------------------------------------------------|---------------------------------------------------|---------------------------|-----------------|------------------|------------------|-----------------|
|                                                           |                                                   | <i>ndhF</i>               | ITS             | <i>ppc-aL2</i>   | <i>ppc-aR</i>    | <i>phyB</i>     |
| <i>Antheophora cristata</i> (Döll) De Wild. & T. Durand   | P. Poilecot 4739 (G)                              | HE573493                  | –               | –                | –                | –               |
| <i>Antheophora elongata</i> De Wild.                      | S. Malcomber 3081 (MO)                            | HE573494                  | –               | –                | –                | –               |
| <i>Antheophora pubescens</i> Nees                         | –                                                 | JN604676                  | –               | –                | –                | –               |
| <i>Apluda mutica</i> L.                                   | –                                                 | AF117392                  | –               | –                | –                | –               |
| <i>Apochloa euprepes</i> (Renvoize) Zuloaga & Morrone     | C. Silva et al. 711 (HUEFS)                       | KP878922                  | KP878857        | –                | –                | –               |
| <i>Apochloa euprepes</i> (Renvoize) Zuloaga & Morrone     | –                                                 | –                         | –               | –                | –                | EU272416        |
| <i>Arthropogon villosus</i> Nees                          | –                                                 | –                         | –               | –                | –                | EU272417        |
| <i>Arundinella berteroniana</i> (Schult.) Hitchc. & Chase | M. Nee 50403 (G)                                  | HE573488                  | –               | –                | –                | –               |
| <i>Arundinella deppeana</i> Nees ex Steud.                | G Sanchez-Ken 676 (ISC)                           | AM849214                  | –               | –                | –                | –               |
| <i>Arundinella hirta</i> (Thunb.) Tanaka                  | –                                                 | AF117393                  | –               | –                | –                | –               |
| <i>Arundinella nepalensis</i> Trin.                       | –                                                 | AF117394                  | –               | –                | –                | –               |
| <i>Arundo donax</i> L.                                    | –                                                 | GU222718                  | –               | –                | –                | –               |
| <i>Austroanthonia setacea</i> (R. Br.) H.P. Linder        | S.J. & T.R. Hodgkinson 9466 (TCD)                 | HE573549                  | –               | –                | –                | –               |
| <i>Axonopus fissifolius</i> (Raddi) Kuhlms.               | –                                                 | –                         | –               | –                | –                | EU272418        |
| <b><i>Brachiaria comorensis</i> (Mez) A. Camus</b>        | <b>Nanjarisoa O.P. 193 (K, MO, P, TAN)</b>        | <b>LT593944</b>           | –               | –                | –                | –               |
| <b><i>Brachiaria fragrans</i> A. Camus</b>                | <b>J.M. Bosser 19160 (P06769493)</b>              | <b>KX663837</b>           | <b>LT593966</b> | <b>LT614679</b>  | <b>LT614682</b>  | <b>LT593971</b> |
| <b><i>Brachiaria tsiafajavonensis</i> A. Camus</b>        | <b>M.S. Vorontsova et al. 697 (K, MO, P, TAN)</b> | <b>LT593938</b>           | –               | –                | –                | –               |
| <i>Brachypodium distachyon</i> (L.) P. Beauv.             | –                                                 | –                         | –               | XM_0148984<br>20 | XM_0035719<br>01 | –               |
| <i>Brachypodium pinnatum</i> (L.) P. Beauv.               | PI-440176                                         | –                         | –               | –                | –                | AF137294        |
| <i>Bromuniola gossweileri</i> Stapf & C.E. Hubb.          | –                                                 | AY847124                  | –               | –                | –                | –               |
| <i>Buergersiochloa bambusoides</i> Pilg.                  | S. Dransfield 1383                                | –                         | –               | –                | –                | AF137295        |
| <i>Calypochloa gracillima</i> C.E. Hubb.                  | –                                                 | JN604677                  | –               | –                | –                | –               |
| <i>Capillipedium parviflorum</i> (R. Br.) Stapf           | PI-301782                                         | –                         | –               | –                | –                | AF137296        |
| <i>Cenchrus abyssinicus</i> (Hack.) Morrone               | Friis et al. 6699 (K)                             | GU561512                  | –               | –                | –                | –               |
| <i>Cenchrus agrimonioides</i> Trin.                       | Morden 1554 (HAW)                                 | AY623745                  | –               | –                | –                | –               |
| <i>Cenchrus americanus</i> (L.) Morrone                   | –                                                 | –                         | –               | –                | –                | EU272452        |
| <i>Cenchrus americanus</i> (L.) Morrone                   | –                                                 | KJ490012                  | –               | –                | –                | –               |

| Taxon                                                      | Voucher                      | GenBank accession numbers |     |                |               |             |
|------------------------------------------------------------|------------------------------|---------------------------|-----|----------------|---------------|-------------|
|                                                            |                              | <i>ndhF</i>               | ITS | <i>ppc-aL2</i> | <i>ppc-aR</i> | <i>phyB</i> |
| <i>Cenchrus basedowii</i> (Summerh. & C.E. Hubb.) Morrone  | Pullen 10417 (CANB)          | GU561515                  | –   | –              | –             | –           |
| <i>Cenchrus brownii</i> Roem. & Schult.                    | Ramia & Marrero 9349 (SI)    | GU561513                  | –   | –              | –             | –           |
| <i>Cenchrus caliculatus</i> Cav.                           | –                            | EF189886                  | –   | –              | –             | –           |
| <i>Cenchrus chilensis</i> (E. Desv.) Morrone               | Zuloaga et al. 8617 (SI)     | GU561516                  | –   | –              | –             | –           |
| <i>Cenchrus ciliaris</i> L.                                | Kellogg 1125 (MO)            | EU741937                  | –   | –              | –             | –           |
| <i>Cenchrus clandestinus</i> (Hochst. ex Chiov.) Morrone   | Morrone s.n. (SI)            | GU561517                  | –   | –              | –             | –           |
| <i>Cenchrus echinatus</i> L.                               | Christin 149 (BRU)           | HF558460                  | –   | –              | –             | –           |
| <i>Cenchrus flaccidus</i> (Griseb.) Morrone                | Doust 1373                   | AF499150                  | –   | –              | –             | –           |
| <i>Cenchrus frutescens</i> L.                              | Deginiani 1822 (SI)          | GU561519                  | –   | –              | –             | –           |
| <i>Cenchrus glaucus</i> Mudaliar & Sundaraj                | Caxambu 375 (MBM)            | GU561521                  | –   | –              | –             | –           |
| <i>Cenchrus incertus</i> M.A. Curtis                       | Morrone & Giussani 5166 (SI) | GU561514                  | –   | –              | –             | –           |
| <i>Cenchrus latifolius</i> (Spreng.) Morrone               | Morrone 5231 (SI)            | GU561524                  | –   | –              | –             | –           |
| <i>Cenchrus longissimus</i> (S.L. Chen & Y.X. Jin) Morrone | G. Besnard 23-2004 (G)       | –                         | –   | –              | FR845905      | –           |
| <i>Cenchrus longissimus</i> (S.L. Chen & Y.X. Jin) Morrone | G Besnard 23-2004 (G)        | AM849181                  | –   | –              | –             | –           |
| <i>Cenchrus macrourus</i> (Trin.) Morrone                  | CN 87800                     | GU561525                  | –   | –              | –             | –           |
| <i>Cenchrus massaicus</i> (Stapf) Morrone                  | Greenway & Kanuri 12834 (K)  | GU561526                  | –   | –              | –             | –           |
| <i>Cenchrus mezianus</i> (Leeke) Morrone                   | PI 214061                    | GU561527                  | –   | –              | –             | –           |
| <i>Cenchrus myosuroides</i> Kunth                          | Doust 1376                   | AF499152                  | –   | –              | –             | –           |
| <i>Cenchrus nervosus</i> (Nees) Kuntze                     | Morrone 5329 (SI)            | GU561529                  | –   | –              | –             | –           |
| <i>Cenchrus orientalis</i> (Rich.) Morrone                 | CN 84066                     | GU561530                  | –   | –              | –             | –           |
| <i>Cenchrus pedicellatus</i> (Trin.) Morrone               | CN 87902                     | GU561531                  | –   | –              | –             | –           |
| <i>Cenchrus pilosus</i> Kunth                              | –                            | EF189887                  | –   | –              | –             | –           |
| <i>Cenchrus polystachios</i> (L.) Morrone                  | Morrone & Belgrano 5060 (SI) | GU561533                  | –   | –              | –             | –           |
| <i>Cenchrus purpureus</i> (Schumach.) Morrone              | Morrone et al. 4473 (SI)     | GU561534                  | –   | –              | –             | –           |
| <i>Cenchrus ramosus</i> (Hochst.) Morrone                  | CN 84079                     | GU561535                  | –   | –              | –             | –           |
| <i>Cenchrus setaceus</i> (Forssk.) Morrone                 | –                            | HE573510                  | –   | –              | –             | –           |
| <i>Cenchrus setigerus</i> Vahl.                            | Doust 1377                   | AF499153                  | –   | –              | –             | –           |
| <i>Cenchrus sieberianus</i> (Schltdl.) Verloove            | PI 532675                    | GU561538                  | –   | –              | –             | –           |

| Taxon                                                                                  | Voucher                                            | GenBank accession numbers |                 |                 |                 |                 |
|----------------------------------------------------------------------------------------|----------------------------------------------------|---------------------------|-----------------|-----------------|-----------------|-----------------|
|                                                                                        |                                                    | <i>ndhF</i>               | ITS             | <i>ppc-aL2</i>  | <i>ppc-aR</i>   | <i>phyB</i>     |
| <i>Cenchrus squamulatus</i> (Fresen.) Morrone                                          | PI 248534                                          | GU561540                  | –               | –               | –               | –               |
| <i>Cenchrus thunbergii</i> (Kunth) Morrone                                             | CN 87791                                           | GU561541                  | –               | –               | –               | –               |
| <i>Cenchrus trachyphyllus</i> (Pilg.) Morrone                                          | Bogdan 1151 (K)                                    | GU561542                  | –               | –               | –               | –               |
| <i>Cenchrus tristachyus</i> (Kunth) Kuntze                                             | Morrone & al. 4234 (SI)                            | GU561543                  | –               | –               | –               | –               |
| <i>Cenchrus unisetus</i> (Nees) Morrone                                                | Friis & Vollesen 129 (K)                           | GU561544                  | –               | –               | –               | –               |
| <i>Cenchrus violaceus</i> (Lam.) Morrone                                               | J.N. Labat et al. 3983 (P)                         | HE575799                  | –               | –               | –               | –               |
| <i>Cenotheca lappacea</i> (L.) Desv.                                                   | –                                                  | AY847122                  | –               | –               | –               | –               |
| <i>Centropodia glauca</i> (Nees) Cope                                                  | Linder, H.P. 5410 (BOL)                            | EU400772                  | –               | –               | –               | –               |
| <b><i>Chasechloa egregia</i> (Mez) A. Camus</b>                                        | <b>L.H. Boivin s.n. (P00710482)</b>                | <b>KX663836</b>           | <b>LT593967</b> | <b>LT614681</b> | <b>LT614684</b> | <b>LT593970</b> |
| <b><i>Chasechloa madagascariensis</i> (Baker) A. Camus</b>                             | <b>H. Perrier de la Bâthie 11217 (P02351581)</b>   | <b>KX663838</b>           | <b>LT593968</b> | <b>LT614680</b> | <b>LT614683</b> | <b>LT593969</b> |
| <b><i>Chasechloa madagascariensis</i> (Baker) A. Camus</b>                             | <b>M. Bardot-Vaucoulon et al. 1281 (MO5966882)</b> | <b>KX364492</b>           | <b>KX364491</b> | –               | –               | –               |
| <i>Chasmanthium curvifolium</i> (Valdés-Reyna, Morden & S.L. Hatch) Wipff & S.D. Jones | –                                                  | AY847125                  | –               | –               | –               | –               |
| <i>Chasmanthium latifolium</i> (Michx.) H.O. Yates                                     | Chase 19162 (K)                                    | –                         | –               | –               | FR845901        | –               |
| <i>Chasmanthium latifolium</i> (Michx.) H.O. Yates                                     | E.A. Kellogg V13                                   | –                         | –               | –               | –               | AF137297        |
| <i>Chasmanthium latifolium</i> (Michx.) H.O. Yates                                     | Peterson 17532 (US)                                | EF422909                  | –               | –               | –               | –               |
| <i>Chasmanthium laxum</i> (L.) H.O. Yates                                              | –                                                  | AY847126                  | –               | –               | –               | –               |
| <i>Chasmanthium nitidum</i> (Baldwin ex Elliott) H.O. Yates                            | –                                                  | GU222699                  | –               | –               | –               | –               |
| <i>Chasmanthium sessiliflorum</i> (Poir.) H.O. Yates                                   | –                                                  | AY847127                  | –               | –               | –               | –               |
| <i>Chionachne koenigii</i> (Spreng.) Thwaites                                          | –                                                  | –                         | –               | –               | –               | AF443801        |
| <i>Chionachne koenigii</i> (Spreng.) Thwaites                                          | –                                                  | AF117397                  | –               | –               | –               | –               |
| <i>Chionochloa antarctica</i> (Hook. f.) Zotov                                         | Lloyd, K. 57955 (OTA)                              | EU400774                  | –               | –               | –               | –               |
| <i>Chrysopogon fulvus</i> (Spreng.) Chiov.                                             | –                                                  | AF117398                  | –               | –               | –               | –               |
| <i>Cleistachne sorghoides</i> Benth.                                                   | –                                                  | AF117400                  | –               | –               | –               | –               |
| <i>Coix aquatica</i> Roxb.                                                             | –                                                  | –                         | –               | –               | –               | AF443806        |
| <i>Cortaderia archboldii</i> (Hitchc.) Connor & Edgar                                  | J. Marsden 115 (K)                                 | HE575788                  | –               | –               | –               | –               |
| <i>Cymbopogon flexuosus</i> (Nees ex Steud.) Will. Watson                              | –                                                  | AF117404                  | –               | –               | –               | –               |
| <i>Cynodon dactylon</i> (L.) Pers.                                                     | G. Besnard 70-2006 (G)                             | –                         | –               | FN298419        | FN298417        | –               |

| Taxon                                                      | Voucher                                           | GenBank accession numbers |          |                |               |                       |
|------------------------------------------------------------|---------------------------------------------------|---------------------------|----------|----------------|---------------|-----------------------|
|                                                            |                                                   | <i>ndhF</i>               | ITS      | <i>ppc-aL2</i> | <i>ppc-aR</i> | <i>phyB</i>           |
| <i>Cyperochloa hirsuta</i> Lazarides & L. Watson           | –                                                 | AY847139                  | –        | –              | –             | –                     |
| <b><i>Cyphochlaena madagascariensis</i> Hack.</b>          | <b>M.S. Vorontsova et al. 954 (K, MO, P, TAN)</b> | <b>LT593940</b>           | –        | –              | –             | –                     |
| <i>Cyrtococcum multinode</i> (Lam.) Clayton                | M.S. Vorontsova et al. 302 (K, MO, P, TAN)        | HF558465                  | –        | –              | –             | –                     |
| <i>Cyrtococcum patens</i> (L.) A. Camus                    | G. Besnard 10-2004 (G)                            | –                         | –        | FN298422       | FN298423      | FR845919              |
| <i>Cyrtococcum patens</i> (L.) A. Camus                    | G. Besnard 10-2004 (G)                            | –                         | –        | –              | –             | FR845920              |
| <i>Dactyloctenium aegyptium</i> (L.) Willd.                | T. Renaud 05-2005 (G)                             | –                         | –        | FN298425       | FR845902      | –                     |
| <i>Danthonia spicata</i> (L.) P. Beauv. ex Roem. & Schult. | –                                                 | FR839624                  | –        | –              | –             | –                     |
| <i>Danthoniopsis dinteri</i> (Pilg.) C.E. Hubb.            | PI-207548                                         | –                         | –        | –              | –             | AF137300              |
| <i>Dichantherium clandestinum</i> (L.) Gould               | GD:37887                                          | –                         | –        | –              | –             | FR845922,<br>FR845923 |
| <i>Dichantherium sabulorum</i> (Lam.) Gould & C.A. Clark   | –                                                 | –                         | –        | –              | –             | EU272425              |
| <i>Digitaria ciliaris</i> (Retz.) Koeler                   | –                                                 | –                         | –        | –              | –             | EU272426              |
| <i>Digitaria didactyla</i> Willd.                          | G. Besnard 28-2006                                | –                         | –        | FR845884       | FR845893      | –                     |
| <i>Digitaria sanguinalis</i> (L.) Scop.                    | G. Besnard 01-2005                                | –                         | –        | FR845883       | –             | –                     |
| <i>Distichlis spicata</i> (L.) Greene                      | Columbus 3432 (RSA )                              | EF561670                  | –        | –              | –             | –                     |
| <i>Echinochloa colona</i> (L.) Link                        | C. Silva 850 (HUEFS)                              | KP878923                  | KP878858 | –              | –             | –                     |
| <i>Echinochloa colona</i> (L.) Link                        | –                                                 | –                         | –        | –              | –             | EU272429              |
| <i>Echinochloa crus-galli</i> (L.) P. Beauv.               | G. Besnard 04-2001                                | –                         | –        | FR845885       | –             | –                     |
| <i>Echinochloa crus-galli</i> (L.) P. Beauv.               | –                                                 | –                         | –        | –              | AY251482      | –                     |
| <i>Echinochloa frumentacea</i> Link                        | –                                                 | –                         | –        | –              | –             | EU272430              |
| <i>Echinolaena gracilis</i> Swallen                        | S.N. Moreira 1530 (BHCB)                          | KP878924                  | KP878859 | –              | –             | –                     |
| <i>Echinolaena inflexa</i> (Poir.) Chase                   | C. Silva et al. 271 (HUEFS)                       | KP878925                  | KP878860 | –              | –             | –                     |
| <i>Echinolaena inflexa</i> (Poir.) Chase                   | –                                                 | –                         | –        | –              | –             | EU272431              |
| <i>Ehrharta erecta</i> Lam.                                | E.A. Kellogg V44                                  | –                         | –        | –              | –             | AF137302              |
| <i>Elionurus muticus</i> (Spreng.) Kuntze                  | –                                                 | AF117410                  | –        | –              | –             | –                     |
| <i>Eragrostis curvula</i> (Schrad.) Nees                   | M. Chase 9268.B (K)                               | HE577867                  | –        | –              | –             | –                     |
| <i>Eriachne pulchella</i> Domin                            | –                                                 | GU222715                  | –        | –              | –             | –                     |
| <i>Garnotia fergusonii</i> Trimen                          | E. Barnes, s.n (K)                                | HE575794                  | –        | –              | –             | –                     |

| Taxon                                                                    | Voucher                            | GenBank accession numbers |          |                |               |             |
|--------------------------------------------------------------------------|------------------------------------|---------------------------|----------|----------------|---------------|-------------|
|                                                                          |                                    | <i>ndhF</i>               | ITS      | <i>ppc-aL2</i> | <i>ppc-aR</i> | <i>phyB</i> |
| <i>Glyceria grandis</i> S. Watson                                        | J.I. Davis & R.J. Soreng s.n.      | –                         | –        | –              | –             | AF137305    |
| <i>Guadua</i> sp.                                                        | T.R. Hodkinson s.n. (TCD)          | –                         | –        | –              | FR845894      | –           |
| <i>Gynerium sagittatum</i> (Aubl.) P. Beauv.                             | C. Snak et al. 914 (HUEFS)         | KP878926                  | KP878861 | –              | –             | –           |
| <i>Gynerium sagittatum</i> (Aubl.) P. Beauv.                             |                                    | GU222701                  | –        | –              | –             | –           |
| <i>Hakonechloa macra</i> (Munro) Honda                                   | E.A. Kellogg V21                   | –                         | –        | –              | –             | AF137306    |
| <i>Heteropogon contortus</i> (L.) P. Beauv. ex Roem. & Schult.           | –                                  | –                         | –        | –              | –             | AF443810    |
| <i>Heteropogon contortus</i> (L.) P. Beauv. ex Roem. & Schult.           | –                                  | AF117411                  | –        | –              | –             | –           |
| <i>Hildaea breviscrops</i> (Döll) C. Silva & R.P. Oliveira               | R.P. Oliveira et al. 1885 (HUEFS)  | KP878927                  | KP878862 | –              | –             | –           |
| <i>Hildaea pallens</i> (Sw.) C. Silva & R.P. Oliveira                    | C. Silva & N.M. Corrêa 327 (HUEFS) | KP878928                  | KP878863 | –              | –             | –           |
| <i>Hildaea pallens</i> (Sw.) C. Silva & R.P. Oliveira                    | –                                  | –                         | –        | –              | –             | EU272437    |
| <i>Hildaea pallens</i> var. <i>major</i> (Nees) C. Silva & R.P. Oliveira | R.J. Jago & B. Wannan 5716 (CANB)  | –                         | KP878864 | –              | –             | –           |
| <i>Hildaea ruprechtii</i> (Döll) C. Silva & R.P. Oliveira                | (GO) C. Silva et al. 636 (HUEFS)   | KP878929                  | KP878865 | –              | –             | –           |
| <i>Hildaea ruprechtii</i> (Döll) C. Silva & R.P. Oliveira                | (RJ) C. Silva 745 (HUEFS)          | KP878930                  | KP878866 | –              | –             | –           |
| <i>Hildaea</i> sp.                                                       | (PA) Costa et al. 903 (BHCB)       | KP878931                  | KP878867 | –              | –             | –           |
| <i>Hildaea tenuis</i> (J. Presl & C. Presl) C. Silva & R.P. Oliveira     | A.C. Mota & C. Silva 431 (HUEFS)   | KP878932                  | KP878868 | –              | –             | –           |
| <i>Holcus lanatus</i> L.                                                 | G. Besnard 05-2002 (G)             | –                         | –        | FN298428       | FR845903      | –           |
| <i>Homolepis glutinosa</i> (Sw.) Zuloaga & Soderstr.                     | –                                  | –                         | –        | –              | –             | EU272434    |
| <i>Homolepis isocalycia</i> (G. Mey.) Chase                              | –                                  | –                         | –        | –              | –             | EU272435    |
| <i>Hordeum vulgare</i> L.                                                | NIASHv2033B15                      | –                         | –        | –              | –             | AK365283    |
| <i>Hyparrhenia hirta</i> (L.) Stapf                                      | P.A. Christin 03-2005 (G)          | –                         | –        | –              | FR845895      | –           |
| <i>Hyparrhenia hirta</i> (L.) Stapf                                      | –                                  | –                         | –        | –              | –             | AF443811    |
| <i>Hyparrhenia hirta</i> (L.) Stapf                                      | –                                  | AF117412                  | –        | –              | –             | –           |
| <i>Ichnanthus</i> aff. <i>bambusiflorus</i> (Trin.) Döll                 | (BA) C. Silva et al. 722 (HUEFS)   | KP878934                  | KP878870 | –              | –             | –           |
| <i>Ichnanthus</i> aff. <i>bambusiflorus</i> (Trin.) Döll                 | (MG) C. Silva et al. 751-A (HUEFS) | KP878935                  | KP878871 | –              | –             | –           |
| <i>Ichnanthus</i> aff. <i>hoffmannseggii</i> (Roem. & Schult.) Döll      | C. Silva et al. 815 (HUEFS)        | KP878936                  | KP878872 | –              | –             | –           |
| <i>Ichnanthus</i> aff. <i>leiocarpus</i> (Spreng.) Kunth                 | C. Silva & N.M. Corrêa 332 (HUEFS) | KP878937                  | KP878873 | –              | –             | –           |
| <i>Ichnanthus bambusiflorus</i> (Trin.) Döll                             | (BA) C. Silva et al. 255 (HUEFS)   | –                         | –        | –              | –             | –           |
| <i>Ichnanthus bambusiflorus</i> (Trin.) Döll                             | (MG) C. Silva et al. 746 (HUEFS)   | KP878938                  | KP878874 | –              | –             | –           |

| Taxon                                                         | Voucher                                    | GenBank accession numbers |          |                |               |             |
|---------------------------------------------------------------|--------------------------------------------|---------------------------|----------|----------------|---------------|-------------|
|                                                               |                                            | <i>ndhF</i>               | ITS      | <i>ppc-aL2</i> | <i>ppc-aR</i> | <i>phyB</i> |
| <i>Ichnanthus calvescens</i> (Nees ex Trin.) Döll             | (BA) C. Silva et al. 416 (HUEFS)           | KP878939                  | KP878875 | –              | –             | –           |
| <i>Ichnanthus calvescens</i> (Nees ex Trin.) Döll             | (CE) A.C. Mota & C. Silva 452 (HUEFS)      | KP878940                  | KP878876 | –              | –             | –           |
| <i>Ichnanthus calvescens</i> (Nees ex Trin.) Döll             | (GO) C. Silva et al. 648 (HUEFS)           | KP878941                  | KP878877 | –              | –             | –           |
| <i>Ichnanthus dasycoleus</i> Tutin                            | C. Silva 769 (HUEFS)                       | KP878942                  | KP878878 | –              | –             | –           |
| <i>Ichnanthus glaber</i> (Raddi) Hitchc.                      | C. Silva & J.G. Freitas 315 (HUEFS)        | KP878943                  | KP878879 | –              | –             | –           |
| <i>Ichnanthus hirtus</i> (Raddi) Chase                        | C. Silva & N.M. Corrêa 357 (HUEFS)         | KP878944                  | KP878880 | –              | –             | –           |
| <i>Ichnanthus inconstans</i> (Trin. ex Nees) Döll             | C. Silva et al. 475 (HUEFS)                | KP878945                  | KP878881 | –              | –             | –           |
| <i>Ichnanthus leiocarpus</i> (Spreng.) Kunth                  | C. Silva & N.M. Corrêa 339 (HUEFS)         | KP878947                  | KP878883 | –              | –             | –           |
| <i>Ichnanthus longiglumis</i> Mez                             | C. Silva et al. 522 (HUEFS)                | KP878949                  | KP878885 | –              | –             | –           |
| <i>Ichnanthus mollis</i> Ekman                                | C. Silva 990 (HUEFS)                       | KP878950                  | KP878886 | –              | –             | –           |
| <i>Ichnanthus nemoralis</i> (Schrad.) Hitchc. & Chase         | C. Silva et al. 260 (HUEFS)                | KP878951                  | KP878887 | –              | –             | –           |
| <i>Ichnanthus oplismenoides</i> Munro ex Döll                 | C. Silva et al. 891 (HUEFS)                | KP878952                  | KP878888 | –              | –             | –           |
| <i>Ichnanthus panicoides</i> P. Beauv.                        | R.P. Oliveira et al. 1857 (HUEFS)          | KP878953                  | KP878889 | –              | –             | –           |
| <i>Ichnanthus riedelii</i> (Trin.) Döll                       | C. Silva et al. 422 (HUEFS)                | KP878954                  | KP878890 | –              | –             | –           |
| <i>Ichnanthus</i> sp.                                         | (BA) R.P. Oliveira et al. 1216 (HUEFS)     | KP878955                  | KP878891 | –              | –             | –           |
| <i>Ichnanthus</i> sp.                                         | (MG) C. Silva et al. 550 (HUEFS)           | KP878956                  | KP878892 | –              | –             | –           |
| <i>Ichnanthus zehntneri</i> Mez                               | C. Silva 771 (HUEFS)                       | KP878957                  | KP878893 | –              | –             | –           |
| <i>Isachne mauritiana</i> Kunth                               | G. Besnard 09-2006 (G)                     | –                         | –        | –              | FR845904      | –           |
| <i>Isachne mauritiana</i> Kunth                               | G Besnard 09-2006 (G)                      | AM849162                  | –        | –              | –             | –           |
| <b><i>Lasiacis ligulata</i> Hitchc. &amp; Chase</b>           | <b>J. Olivier 02 (CAY)</b>                 | <b>LT593942</b>           | –        | –              | –             | –           |
| <i>Lasiacis sorghoidea</i> (Desv. ex Ham.) Hitchc. & Chase    | –                                          | –                         | –        | –              | –             | EU272438    |
| <i>Lecomtella madagascariensis</i> A. Camus                   | M.S. Vorontsova et al. 603 (K, MO, P, TAN) | HF543599                  | HG315108 | HG315106       | HG315107      | HG315105    |
| <i>Lolium perenne</i> L.                                      | S. Mathews 402                             | –                         | –        | –              | –             | AF137308    |
| <i>Lygeum spartum</i> L.                                      | R.J. Soreng 3698                           | –                         | –        | –              | –             | AF137309    |
| <i>Megastachya mucronata</i> (Poir.) P. Beauv.                | M. Chase 36798 (K)                         | HE577872                  | –        | –              | –             | –           |
| <i>Megathyrsus maximus</i> (Jacq.) B.K. Simon & S.W.L. Jacobs | P. Rondeau 05-2005 (G)                     | –                         | –        | –              | FR845900      | –           |
| <i>Melica cupani</i> Guss.                                    | PI-383702                                  | –                         | –        | –              | –             | AF137310    |



| Taxon                                                                | Voucher                                 | GenBank accession numbers |          |                |               |             |
|----------------------------------------------------------------------|-----------------------------------------|---------------------------|----------|----------------|---------------|-------------|
|                                                                      |                                         | <i>ndhF</i>               | ITS      | <i>ppc-aL2</i> | <i>ppc-aR</i> | <i>phyB</i> |
| <i>Melinis repens</i> (Willd.) Zizka                                 | C. Silva et al. 626 (HUEFS)             | KP878958                  | KP878894 | –              | –             | –           |
| <i>Melinis repens</i> (Willd.) Zizka                                 | P. Rondeau 06-2005 (G)                  | –                         | –        | –              | FR845896      | –           |
| <i>Melinis repens</i> (Willd.) Zizka                                 | –                                       | –                         | –        | –              | –             | EU272439    |
| <i>Mesosetum chaseae</i> Luces                                       | –                                       | –                         | –        | –              | –             | EU272440    |
| <i>Micraira adamsii</i> Lazarides                                    | M. Lazarides 7768 (K)                   | HE575789                  | –        | –              | –             | –           |
| <i>Microstegium nudum</i> (Trin.) A. Camus                           | –                                       | AF117415                  | –        | –              | –             | –           |
| <i>Mnesithea selloana</i> (Hack.) de Koning & Sosef                  | –                                       | AF117401                  | –        | –              | –             | –           |
| <i>Molinia caerulea</i> (L.) Moench                                  | R.J. Soreng 3305                        | –                         | –        | –              | –             | AF137312    |
| <i>Molinia caerulea</i> (L.) Moench                                  | –                                       | GU222716                  | –        | –              | –             | –           |
| <i>Ocellochloa stolonifera</i> (Poir.) Zuloaga & Morrone             | C. Silva & T.A. Amorim 368 (HUEFS)      | KP878959                  | KP878895 | –              | –             | –           |
| <i>Oedochloa camporum</i> (Swallen) C. Silva & R.P. Oliveira         | C. Silva et al. 676 (HUEFS)             | KP878960                  | KP878896 | –              | –             | –           |
| <i>Oedochloa cordata</i> (Ekman) C. Silva & R.P. Oliveira            | C. Silva et al. 872 (HUEFS)             | KP878961                  | KP878897 | –              | –             | –           |
| <i>Oedochloa grandifolia</i> (Döll) C. Silva & R.P. Oliveira         | K.M. Pimenta & R.P. Oliveira 50 (HUEFS) | KP878962                  | KP878898 | –              | –             | –           |
| <i>Oedochloa minarum</i> (Nees) C. Silva & R.P. Oliveira             | Z.L. Wagner & P.L. Viana 9613 (BHCB)    | KP878963                  | KP878899 | –              | –             | –           |
| <i>Oedochloa procurrens</i> (Nees ex Trin.) C. Silva & R.P. Oliveira | C. Silva et al. 270-A                   | KP878964                  | KP878900 | –              | –             | –           |
| <i>Oplismenus hirtellus</i> (L.) P. Beauv.                           | C. Silva & N.M. Corrêa 351 (HUEFS)      | KP878965                  | KP878901 | –              | –             | –           |
| <i>Oplismenus hirtellus</i> (L.) P. Beauv.                           | G. Besnard 15-2006 (G)                  | –                         | –        | –              | FN298431      | –           |
| <i>Orthoclada laxa</i> (Rich.) P. Beauv.                             | C. Silva et al. 939 (HUEFS)             | –                         | KP878856 | –              | –             | –           |
| <i>Oryza sativa</i> L.                                               | –                                       | –                         | –        | NM191306       | AF271995      | –           |
| <i>Ottochloa nodosa</i> (Kunth) Dandy                                | (1) E.J. Thompson et al. 102 (CANB)     | –                         | KP878902 | –              | –             | –           |
| <i>Ottochloa nodosa</i> (Kunth) Dandy                                | (2) R.J. Cumming 15324 (CANB)           | KP878966                  | KP878903 | –              | –             | –           |
| <i>Ottochloa nodosa</i> (Kunth) Dandy                                | (3) F.R. Willis et al. 87 (CANB)        | –                         | KP878904 | –              | –             | –           |
| <i>Panicum aquaticum</i> Poir.                                       | C. Silva 853 (HUEFS)                    | KP878967                  | KP878905 | –              | –             | –           |
| <i>Panicum capillare</i> L.                                          | M. Lavin s.n.                           | –                         | –        | –              | –             | AF137316    |
| <i>Panicum cervicatum</i> Chase                                      | C. Silva 591 (HUEFS)                    | KP878968                  | KP878906 | –              | –             | –           |
| <i>Panicum laetum</i> Kunth                                          | T. Renaud 06-2005 (G)                   | –                         | –        | –              | FR845897      | FR845924    |
| <i>Panicum laetum</i> Kunth                                          | T. Renaud 06-2005 (G)                   | –                         | –        | –              | –             | FR845925    |

| Taxon                                                                  | Voucher                                           | GenBank accession numbers |          |                |               |             |
|------------------------------------------------------------------------|---------------------------------------------------|---------------------------|----------|----------------|---------------|-------------|
|                                                                        |                                                   | <i>ndhF</i>               | ITS      | <i>ppc-aL2</i> | <i>ppc-aR</i> | <i>phyB</i> |
| <i>Panicum millegrana</i> Poir.                                        | –                                                 | –                         | –        | –              | –             | EU272446    |
| <b><i>Panicum mitopus</i> K. Schum.</b>                                | <b>M.S. Vorontsova et al. 488 (K, MO, P, TAN)</b> | <b>LT593941</b>           | –        | –              | –             | –           |
| <i>Panicum pleianthum</i> Peter                                        | R.C. Hall 53 (K, MO, P, TAN)                      | HF558466                  | –        | –              | –             | –           |
| <i>Panicum racemosum</i> (P. Beauv.) Spreng.                           | C. Silva 852 (HUEFS)                              | KP878969                  | KP878907 | –              | –             | –           |
| <i>Pariana radiceiflora</i> Sagot ex Döll                              | L.G. Clark & W. Zhang 1344                        | –                         | –        | –              | –             | AF137317    |
| <i>Phacelurus digitatus</i> (Sibth. & Sm.) Griseb.                     | –                                                 | AF117418                  | –        | –              | –             | –           |
| <i>Pharus latifolius</i> L.                                            | TCD T.R. Hodkinson 514                            | –                         | –        | FR845886       | FR845898      | –           |
| <i>Phragmites australis</i> (Cav.) Trin. ex Steud.                     | G. Besnard 71-2006 (G)                            | –                         | –        | FN298433       | –             | –           |
| <i>Phragmites australis</i> (Cav.) Trin. ex Steud.                     | –                                                 | –                         | –        | –              | –             | AF137322    |
| <i>Phragmites australis</i> (Cav.) Trin. ex Steud.                     | –                                                 | U21997                    | –        | –              | –             | –           |
| <i>Poecilostachys bakeri</i> (Schinz) C.E. Hubb.                       | M.S. Vorontsova et al. 301 (K, MO, P, TAN)        | HF558486 + update         | –        | –              | –             | –           |
| <i>Poecilostachys bromoides</i> Stapf                                  | G. Besnard 43-2006 (G)                            | –                         | –        | –              | –             | FR845921    |
| <i>Pseudechinolaena polystachya</i> (Kunth) Stapf                      | C. Silva & T.A. Amorim 365 (HUEFS)                | KP878970                  | KP878908 | –              | –             | –           |
| <i>Pseudechinolaena polystachya</i> (Kunth) Stapf                      | –                                                 | –                         | –        | –              | –             | EU272453    |
| <b><i>Pseudolasiacis leptolomoides</i> (A. Camus) A. Camus</b>         | <b>M.S. Vorontsova et al. 983 (K, MO, P, TAN)</b> | <b>LT593939</b>           | –        | –              | –             | –           |
| <i>Pseudosasa japonica</i> (Siebold & Zucc. ex Steud.) Makino ex Nakai | W. Zhang 8400708                                  | –                         | –        | –              | –             | AF137323    |
| <i>Renvoizea</i> sp.                                                   | R.P. Oliveira et al. 2081 (HUEFS)                 | KP878971                  | –        | –              | –             | –           |
| <i>Renvoizea trinii</i> (Kunth) Zuloaga & Morrone                      | C. Silva et al. 718 (HUEFS)                       | KP878972                  | KP878909 | –              | –             | –           |
| <i>Rugoloa pilosa</i> (Sw.) Zuloaga                                    | C. Silva & N.M. Corrêa 335 (HUEFS)                | KP878973                  | KP878910 | –              | –             | –           |
| <i>Saccharum</i> sp.                                                   | Sugarcane cultivar: H32-8560                      | –                         | –        | M86661         | –             | –           |
| <i>Sacciolepis indica</i> (L.) Chase                                   | TCD A.T. & S.S. 654                               | –                         | –        | FR845887       | FR845899      | –           |
| <i>Schismus barbatus</i> (L.) Thell.                                   | S.J. & T.R. Hodkinson 9467 (TCD)                  | HE573550                  | –        | –              | –             | –           |
| <i>Schizachyrium condensatum</i> (Kunth) Nees                          | C. Silva 843 (HUEFS)                              | KP878974                  | KP878911 | –              | –             | –           |
| <i>Schizachyrium scoparium</i> (Michx.) Nash                           | –                                                 | AF117420                  | –        | –              | –             | –           |
| <i>Setaria italica</i> (L.) P. Beauv.                                  | –                                                 | –                         | –        | –              | AY491400      | –           |
| <i>Setaria palmifolia</i> (J. Koenig) Stapf                            | –                                                 | –                         | –        | –              | –             | EU272455    |
| <i>Setaria plicata</i> (Lam.) T. Cooke                                 | G. Besnard 22-2004 (G)                            | –                         | –        | –              | FN298435      | –           |

| Taxon                                                                                   | Voucher                                | GenBank accession numbers |          |                |               |             |
|-----------------------------------------------------------------------------------------|----------------------------------------|---------------------------|----------|----------------|---------------|-------------|
|                                                                                         |                                        | <i>ndhF</i>               | ITS      | <i>ppc-aL2</i> | <i>ppc-aR</i> | <i>phyB</i> |
| <i>Sorghastrum nutans</i> (L.) Nash                                                     | –                                      | AF117421                  | –        | –              | –             | –           |
| <i>Sorghum bicolor</i> (L.) Moench                                                      | –                                      | –                         | –        | Sb03g035090    | X55664        | –           |
| <i>Spartochloa scirpoidea</i> (Steud.) C.E. Hubb.                                       | –                                      | AY847140                  | –        | –              | –             | –           |
| <i>Spinifex littoreus</i> (Burm. f.) Merr.                                              | TCD A.T. & S.S. 657                    | –                         | –        | FR845888       | –             | –           |
| <i>Sporobolus indicus</i> (L.) R. Br.                                                   | M. Chase 9275 (K)                      | HE575785                  | –        | –              | –             | –           |
| <i>Steinchisma hians</i> (Elliott) Nash                                                 | –                                      | –                         | –        | –              | –             | EU272458    |
| <i>Stipagrostis pennata</i> (Trin.) De Winter                                           | –                                      | –                         | –        | FN298438       | FN298442      | –           |
| <i>Stipagrostis plumosa</i> (L.) Munro ex T. Anderson                                   | F. Anthelme 03-2006 (G)                | –                         | –        | FN298436       | –             | –           |
| <i>Streptostachys asperifolia</i> Desv.                                                 | C. Silva et al. 775 (HUEFS)            | KP878975                  | KP878912 | –              | –             | –           |
| <i>Streptostachys asperifolia</i> Desv.                                                 | –                                      | –                         | –        | –              | –             | EU272461    |
| <i>Tatianyx arnaces</i> (Trin.) Zuloaga & Soderstr.                                     | –                                      | –                         | –        | –              | –             | EU272463    |
| <i>Tripsacum dactyloides</i> (L.) L.                                                    | –                                      | AF117433                  | –        | –              | –             | –           |
| <i>Tristachya leucothrix</i> Trin. ex Nees                                              | H. Beck 5018                           | –                         | –        | –              | FR845906      | –           |
| <i>Triticum aestivum</i> L.                                                             | R. Mason-Gamer s.n.                    | –                         | –        | –              | –             | AF137331    |
| <i>Uniola paniculata</i> L.                                                             | –                                      | GU222707                  | –        | –              | –             | –           |
| <i>Yakirra australiensis</i> var. <i>australiensis</i> (Domin) Lazarides & R.D. Webster | S. Legge & S. Murphy 22 (CANB)         | KP878976                  | KP878913 | –              | –             | –           |
| <i>Yakirra australiensis</i> var. <i>intermedia</i> R.D. Webster                        | K.F. Keneally 10619 (CANB)             | –                         | KP878914 | –              | –             | –           |
| <i>Yakirra majuscula</i> (F. Muell. ex Benth.) Lazarides & R.D. Webster                 | S. Legge & S. Murphy 856 (CANB)        | KP878977                  | KP878915 | –              | –             | –           |
| <i>Yakirra muelleri</i> (Hughes) Lazarides & R.D. Webster                               | R.J. Cumming 15771 (CANB)              | KP878978                  | KP878916 | –              | –             | –           |
| <i>Yakirra nulla</i> Lazarides & R.D. Webster                                           | L.A. Craven & G. Whitbread 8135 (CANB) | –                         | KP878917 | –              | –             | –           |
| <i>Yakirra pauciflora</i> (R.Br.) Lazarides & R.D. Webster                              | (1) I. Cowie 2698 (CANB)               | KP878979                  | KP878918 | –              | –             | –           |
| <i>Yakirra pauciflora</i> (R.Br.) Lazarides & R.D. Webster                              | (2) K. Pajimans 2355 (CANB)            | KP878980                  | KP878919 | –              | –             | –           |
| <i>Yakirra pauciflora</i> (R.Br.) Lazarides & R.D. Webster                              | (3) A.A. Mitchell 3820 (CANB)          | KP878981                  | KP878920 | –              | –             | –           |
| <i>Yakirra pauciflora</i> (R.Br.) Lazarides & R.D. Webster                              | (4) I. Cowie & G. Leach 3891 (CANB)    | KP878982                  | KP878921 | –              | –             | –           |
| <i>Zea mays</i> L.                                                                      | –                                      | –                         | –        | –              | AB012228      | –           |
| <i>Zea mays</i> L.                                                                      | M. Lavin s.n.                          | –                         | –        | –              | –             | AF137332    |
| <i>Zoysia japonica</i> Steud.                                                           | M. Chase 9278 (K)                      | AM849197                  | –        | –              | –             | –           |

**Table S2.** Sequence characteristics of nuclear ribosomal DNA units and complete chloroplast genomes generated in the present study by NGS: GenBank accession number, average sequencing depth, and DNA fragment size of the genomic regions.

| Species                            | nrDNA            |                       |                         | Plastid DNA      |                       |               |
|------------------------------------|------------------|-----------------------|-------------------------|------------------|-----------------------|---------------|
|                                    | Accession number | Mean sequencing depth | Recovered fragment size | Accession number | Mean sequencing depth | Plastome size |
| <i>Chasechloa madagascariensis</i> | LT593968         | 1175× ± 521           | 6,726 bp                | KX663838         | 149× ± 63             | 137,989 bp    |
| <i>Chasechloa egregia</i>          | LT593967         | 857× ± 516            | 6,742 bp                | KX663836         | 198× ± 120            | 140,371 bp    |
| <i>Brachiaria fragrans</i>         | LT593966         | 1356× ± 209           | 6,775 bp                | KX663837         | 148× ± 31             | 139,754 bp    |

**Table S3.** Number of paired-end reads ( $N_r$ ; excluding duplicates), size of the assembled fragments (% $S$ ; coverage in percent of the reference sequence) and mean sequencing depth ( $SD$ ) for the three low-copy genes analyzed in this study. The minimum and maximum values for the sequencing depth are given in brackets. The mean sequencing depth on the three DNA regions is also given. Partial gene sequences are deposited to GenBank [accessions numbers LT614682 to LT614684 (*ppc-aR*), LT614679 to LT614681 (*ppc-aL2*), and LT593969 to LT593971 (*phyB*)].

| Species                            |       | <i>ppc-aR</i> (exons 8-10) | <i>ppc-aL2</i> (exons 8-10) | <i>phyB</i>        | Mean |
|------------------------------------|-------|----------------------------|-----------------------------|--------------------|------|
| <i>Chasechloa madagascariensis</i> | $N_r$ | 30                         | 21                          | 5                  |      |
|                                    | % $S$ | 88.9% (1873/2108 bp)       | 88.3% (1766/1983 bp)        | 44.7% (423/946 bp) |      |
|                                    | $SD$  | 3.7× [0-9]                 | 2.6× [0-9]                  | 1.1× [0-4]         | 2.8× |
| <i>Chasechloa egregia</i>          | $N_r$ | 29                         | 17                          | 8                  |      |
|                                    | % $S$ | 79.4% (1731/2181 bp)       | 63.7% (1263/1983 bp)        | 70.1% (663/946 bp) |      |
|                                    | $SD$  | 3.3× [0-10]                | 2.1× [0-9]                  | 1.9× [0-8]         | 2.6× |
| <i>Brachiaria fragrans</i>         | $N_r$ | 41                         | 29                          | 8                  |      |
|                                    | % $S$ | 95.3% (2094/2197 bp)       | 88.1% (1757/1995 bp)        | 87.3% (826/946 bp) |      |
|                                    | $SD$  | 4.3× [0-12]                | 3.2× [0-10]                 | 1.8× [0-6]         | 3.4× |

**Fig. S1.** Full maximum likelihood (ML) phylogram from the analysis of the plastid marker *ndhF* showing the phylogenetic placement of *Chasechloa*. ML bootstrap support values are indicated above branches and Bayesian support values below the branches.

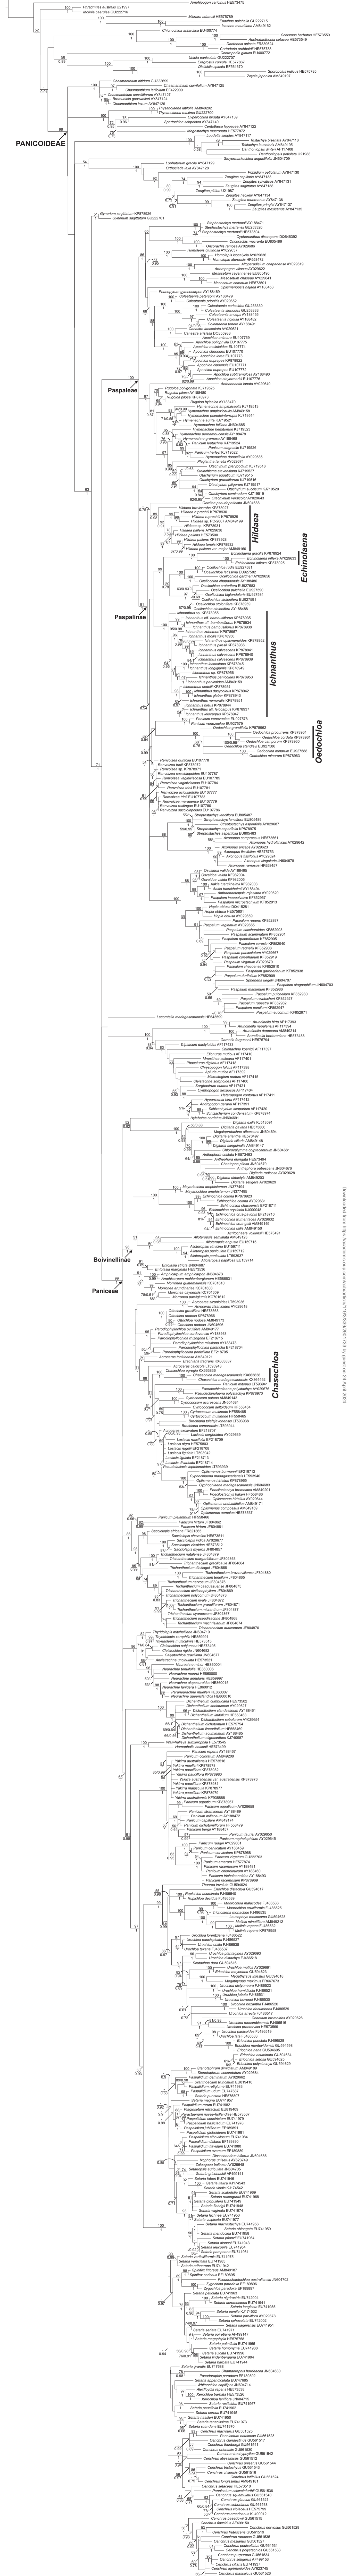

Downloaded from https://academic.oup.com/iad/advance-article-abstract/doi/10.1093/iad/iaab013/6311733 by guest on 24 April 2024

**Fig. S2.** Maximum likelihood (ML) phylogram from the analysis of the nuclear marker ITS showing the phylogenetic placement of *Chasechloa*. ML bootstrap support values are indicated above branches and Bayesian support values below the branches.

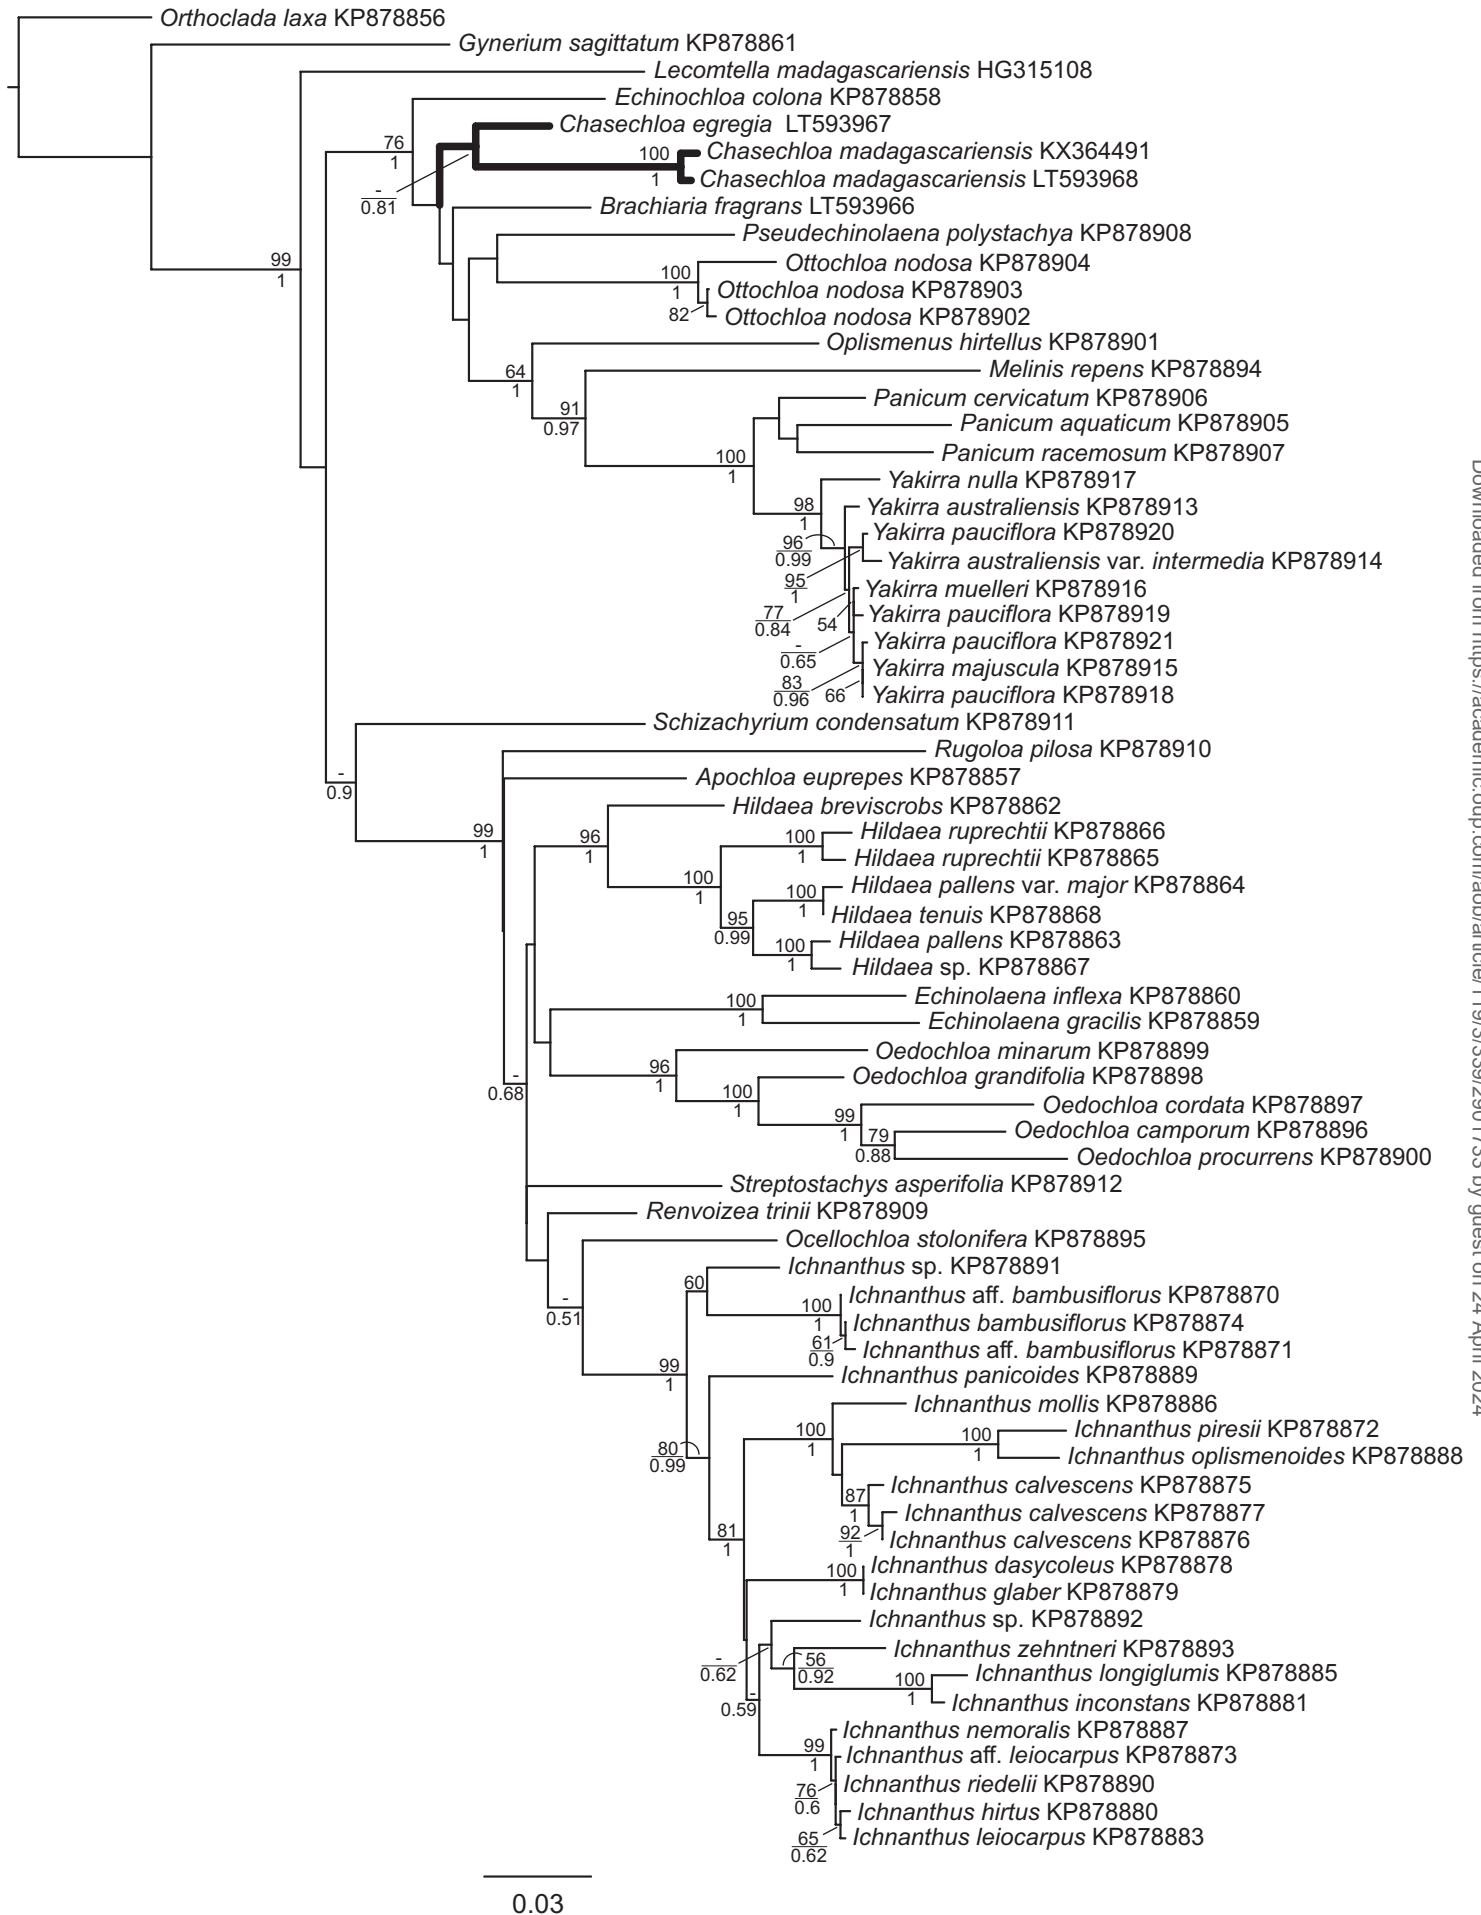

**Fig. S3.** Maximum likelihood (ML) phylogram from the analysis of the nuclear marker *phyB* showing the phylogenetic placement of *Chasechloa*. ML bootstrap support values are indicated above branches and Bayesian support values below the branches.

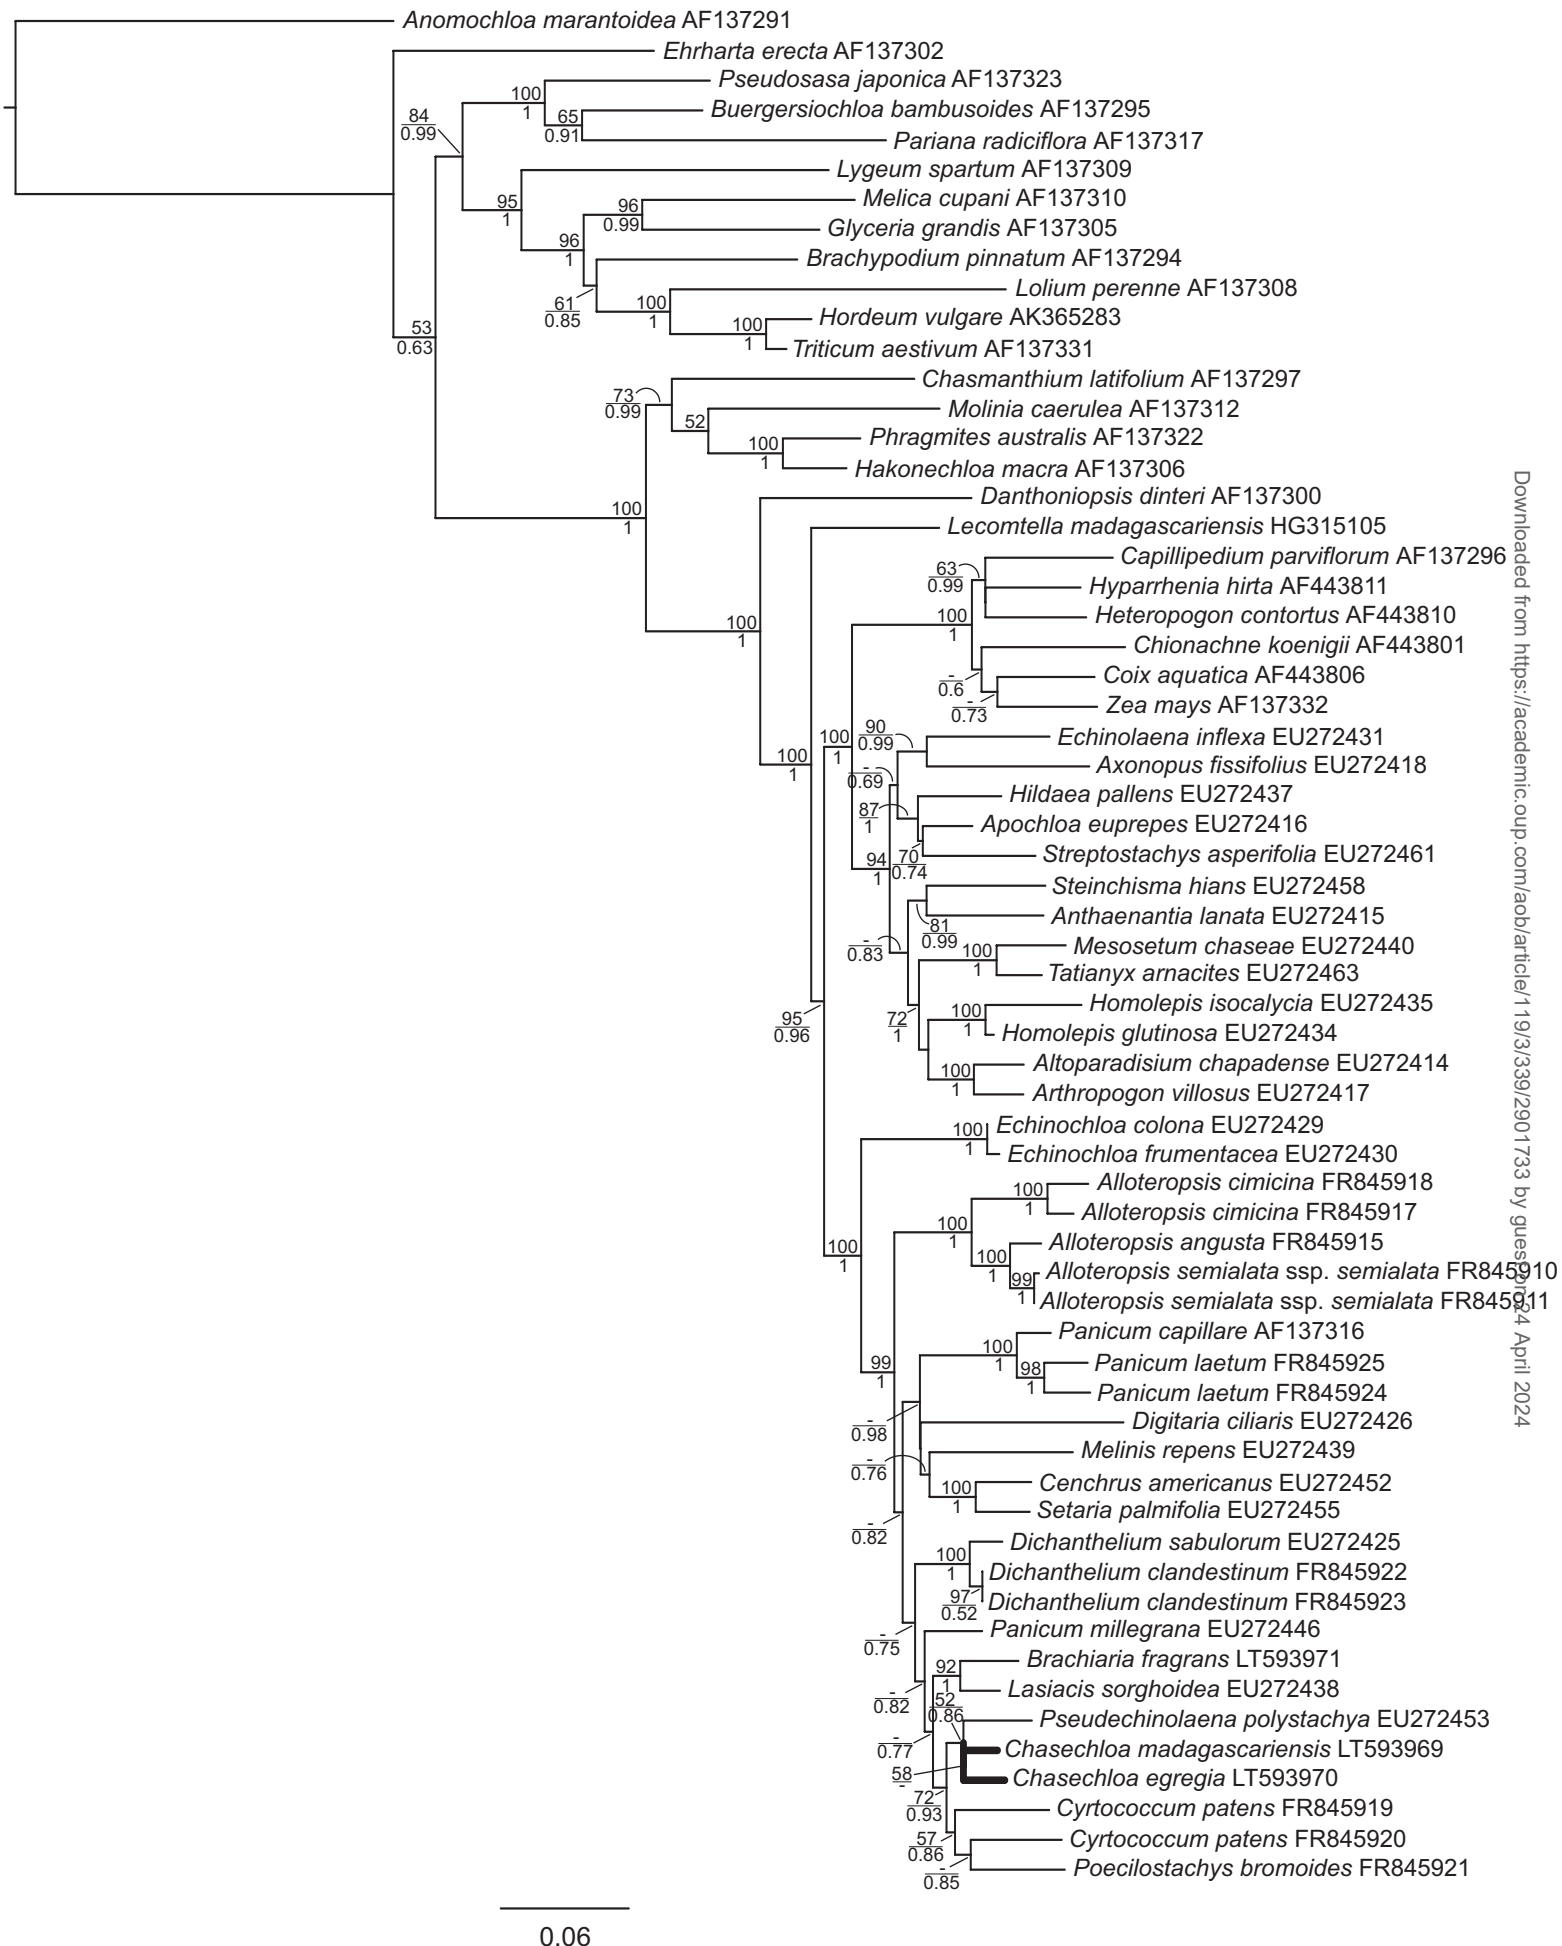



**Fig. S4.** Maximum likelihood (ML) phylogram from the analysis of the nuclear marker *ppc-aL2* showing the phylogenetic placement of *Chasechloa*. ML bootstrap support values are indicated above branches and Bayesian support values below the branches.

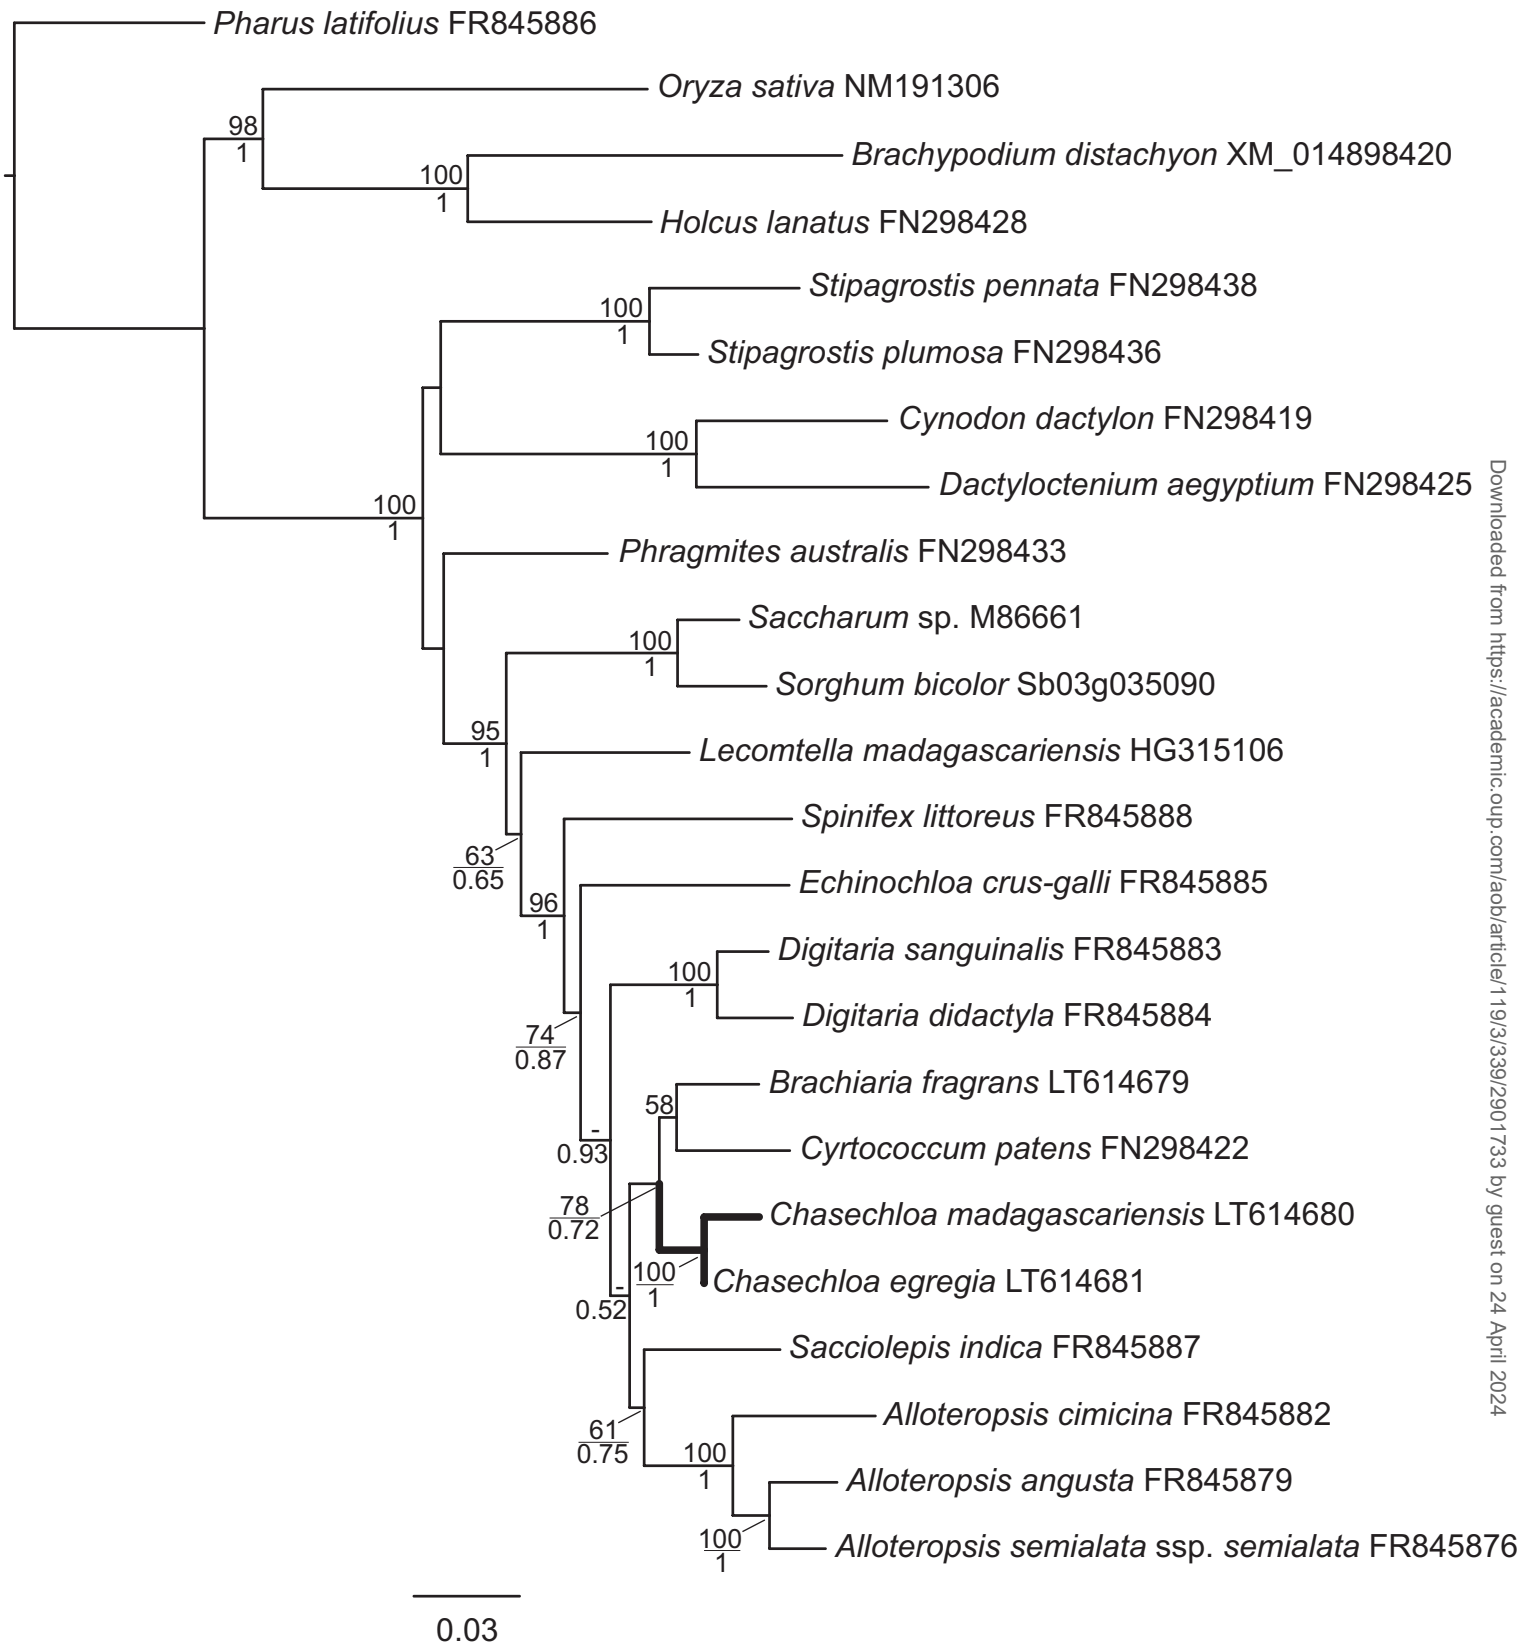

**Fig. S5.** Maximum likelihood (ML) phylogram from the analysis of the nuclear marker *ppc-aR* showing the phylogenetic placement of *Chasechloa*. ML bootstrap support values are indicated above branches and Bayesian support values below the branches.

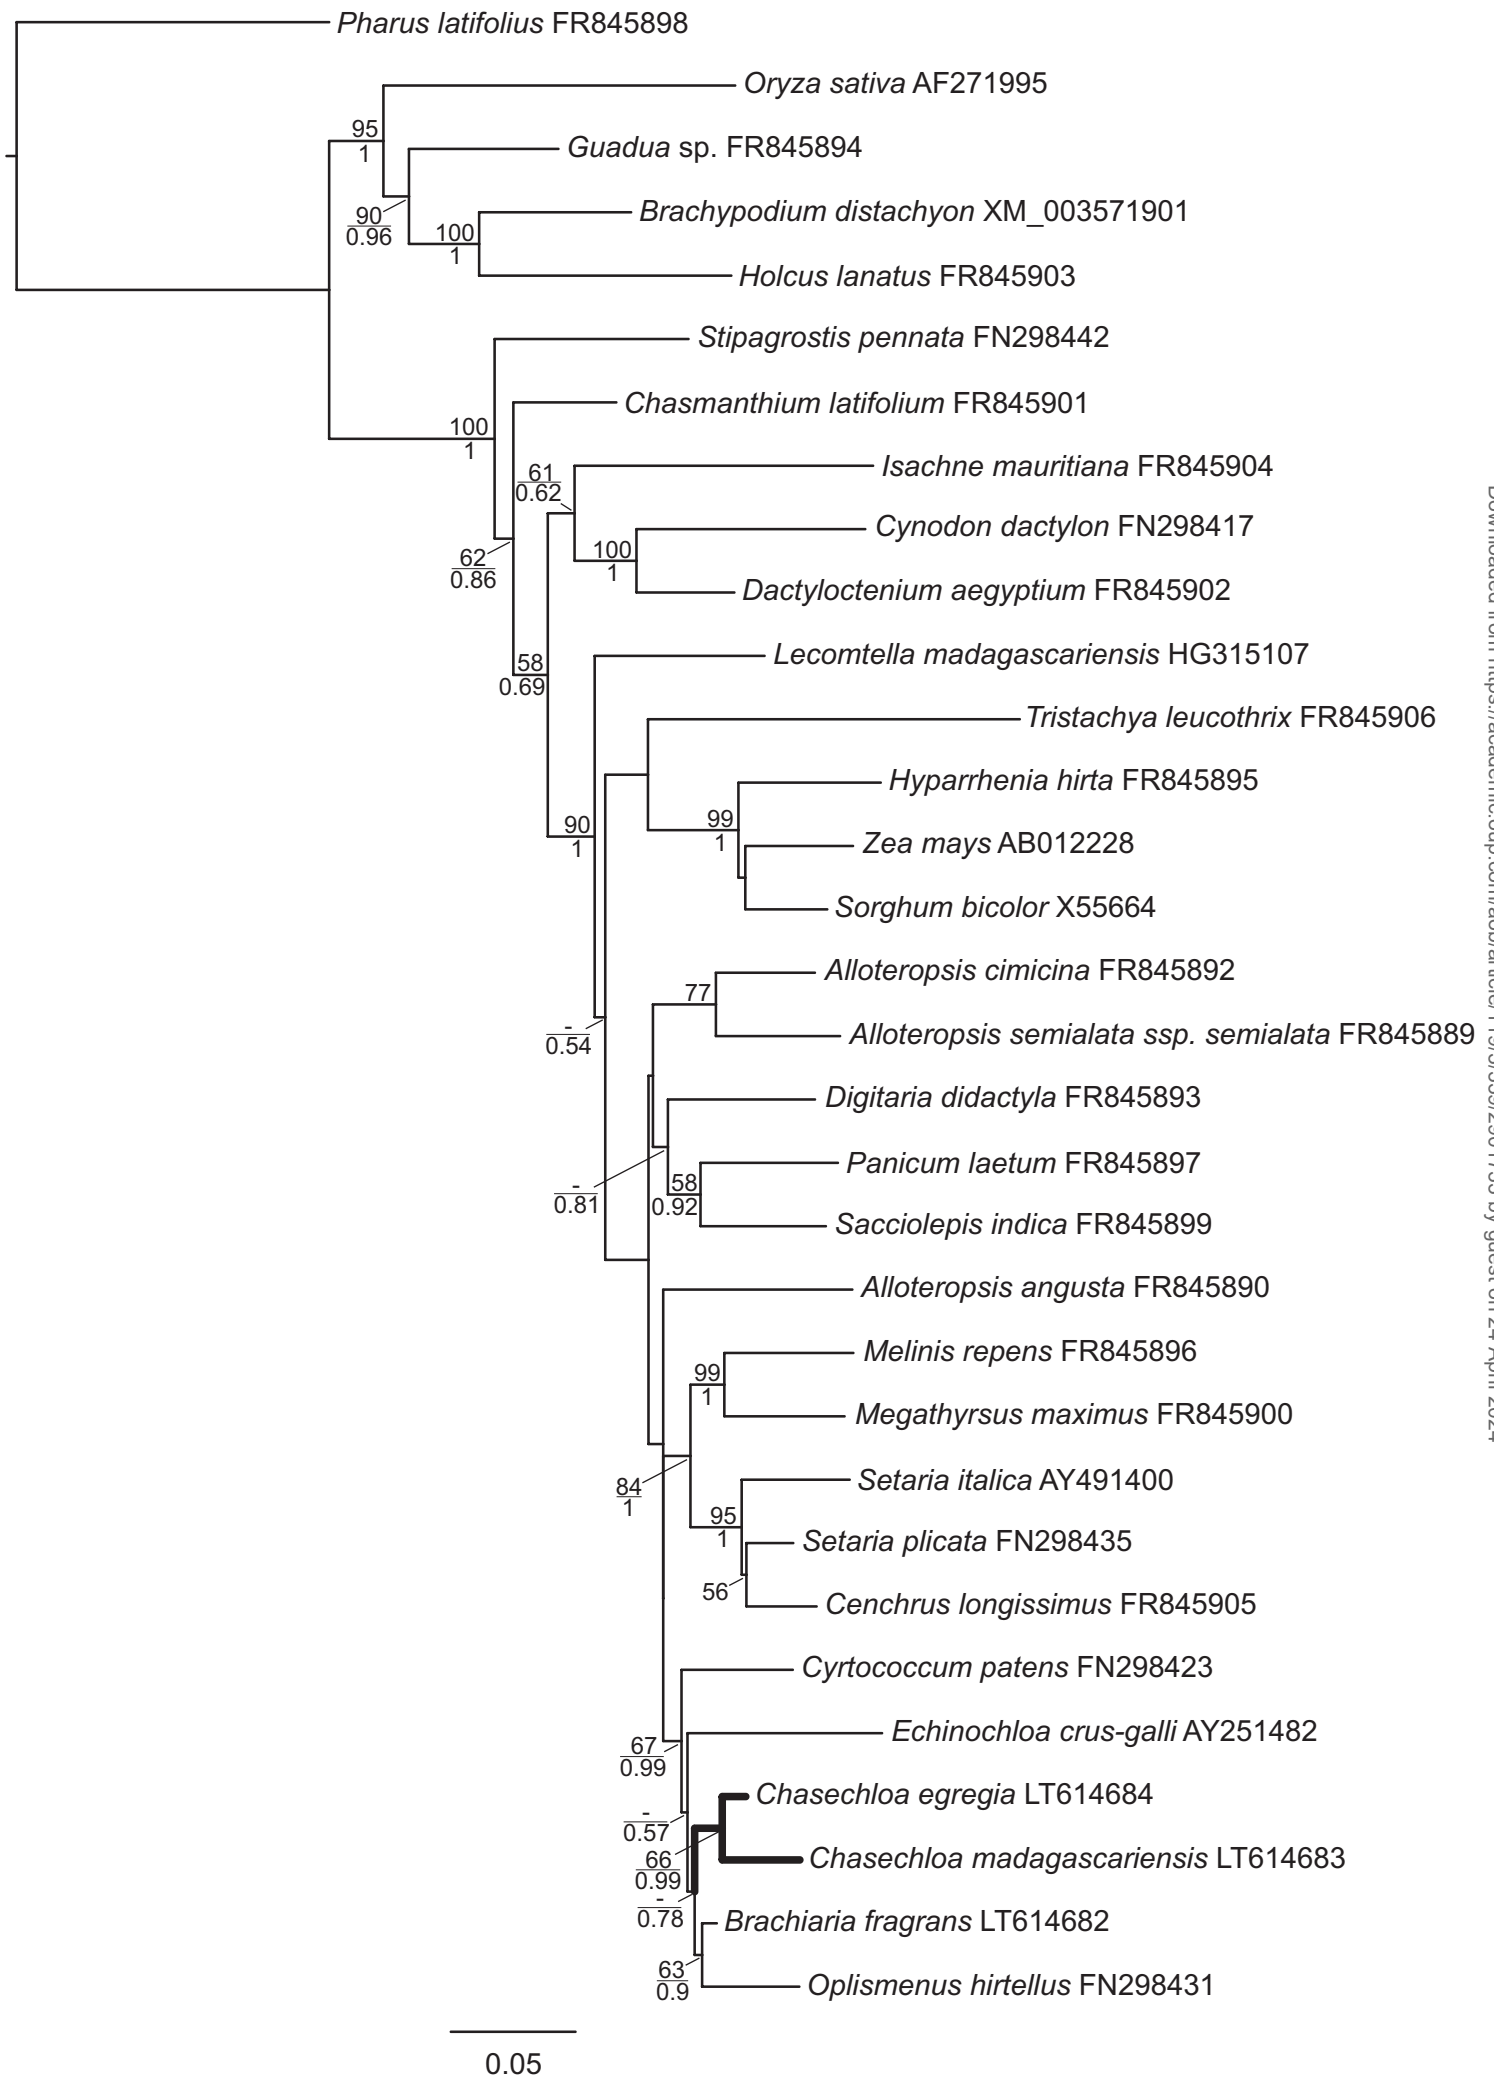

**Fig. S6.** Maximum clade credibility chronogram of the core Panicoideae resulting from the BEAST analysis based on the *ndhF* data set. Numbers on the nodes refer to mean ages. Blue bars represent 95% confidence intervals of ages. (Mya = millions years ago)

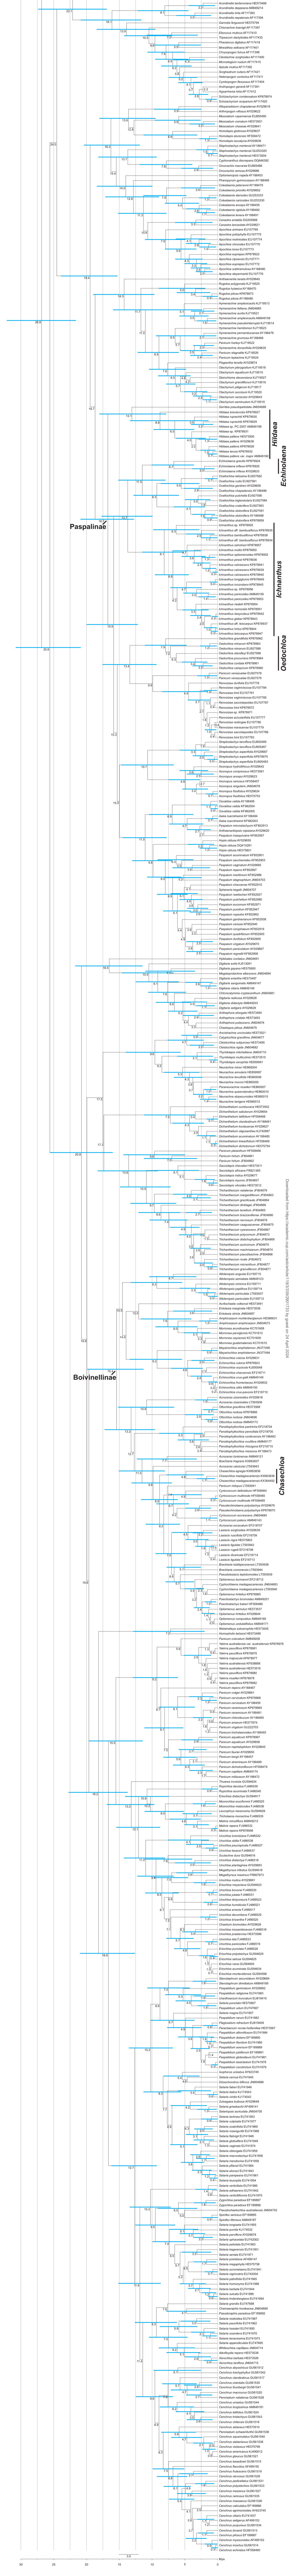

Downloaded from <https://academic.oup.com/iob/advance-article/doi/10.1093/iob/obz017/5393920/5471733> by guest on 24 April 2024
